# Supplementary material
Source: Springer Nature journal article supplement (https://www.springermedizin.de/resource/supplementary/12884_2008_51_MOESM1_ESM.pdf/9459824)

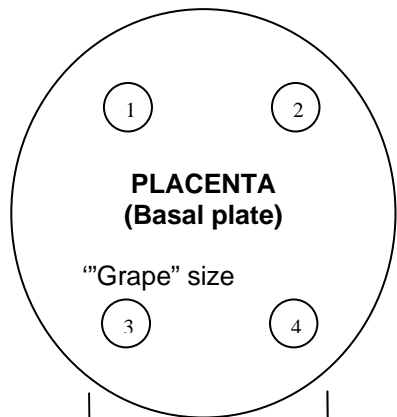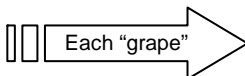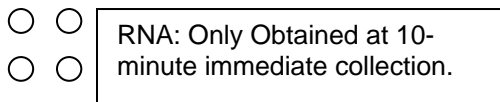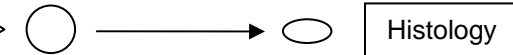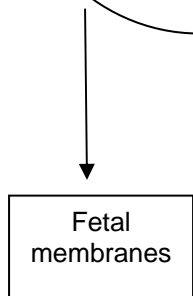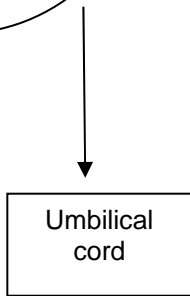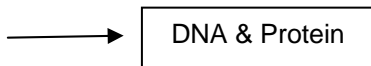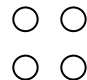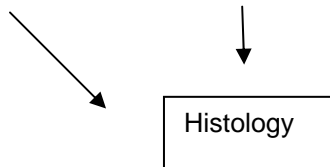

Supplement: MOESM1 [file 9459824]
